# Supplementary material for: A comparative study on the thermal- and microwave-assisted Stille coupling polymerization of a benzodithiophene-based donor–acceptor polymer (PTB7)
Source: Royal Society of Chemistry journal article supplement (doi:10.1039/c6ta09212h), 2017-01-01
Supplement: c6ta09212h1.pdf [file c6ta09212h1.pdf]

## Supplementary information

For

# A comparative study on thermal- and microwave-assisted Stille-coupling polymerization of a benzodithiophene-based donor–acceptor polymer (PTB7)

*Michael Ruby Raj,<sup>‡</sup> Minjun Kim,<sup>‡</sup> Hong Il Kim,<sup>‡</sup> Gang-Young Lee, Cheol Woong Park and Taiho Park\**

*Department of Chemical Engineering, Pohang University of Science and Technology, Cheongam-Ro 77, Nam-gu, Pohang, Gyeongbuk, 790-780 (Korea).*

<sup>‡</sup> These authors contributed equally to this work.

\* Corresponding author: [taihopark@postech.ac.kr](mailto:taihopark@postech.ac.kr)

## Contents

### 1. Materials

### 2. Instruments.

### 3. Fabrication and characterization

### 4. Electrochemical properties

### 5. Raman spectroscopy study

**Scheme S1.** Mechanism of homo-coupled units (**BDT-BDT**, **FTT-FTT**) under the microwave-assisted conditions.

**Fig. S1.** GPC chromatograms of **T-PTB7(31k)** and **M-PTB7** polymers.

**Fig. S2.** TGA curves of **T-PTB7(31k)** and **M-PTB7** polymers with a heating rate of 10°C/min under N<sub>2</sub>.

**Fig. S3.** DSC thermograms of **T-PTB7(31k)** and **M-PTB7** polymers with a heating and cooling rate of 10 °C/min under N<sub>2</sub>.

**Fig. S4.** Cyclic voltammograms of **T-PTB7(31k)** and **M-PTB7** polymers thin films in acetonitrile solution containing 0.1 M Bu<sub>4</sub>NPF<sub>6</sub> at a potential scan rate of 20 mV/s.

**Fig. S5.** (a) Extended Raman spectra for Peak 2 and Peak 3 of **T-PTB7(31k)** and **M-PTB7** polymers (b) Extended Raman spectra for less Raman active weak Peak 4 of **T-PTB7(31k)** and **M-PTB7** polymers.

**Fig. S6.** (a). Statistical analysis of (a) short-circuit current ( $J_{SC}$ ), (b) fill factor (FF), (c) open-circuit voltage ( $V_{OC}$ ) and (d) power conversion efficiency (PCE) depending on the PTB7-polymers.

**Fig. S7.** AFM topographic images of (a) **T-PTB7(31k):PC<sub>70</sub>BM** (1:1.5 w/w %), (b) **M-PTB7(32k):PC<sub>70</sub>BM** (1:1.5 w/w %), and (c) **M-PTB7(75k):PC<sub>70</sub>BM** (1:1.5 w/w %) with DIO-processed. The AFM phase images of (d) **T-PTB7(31k):PC<sub>70</sub>BM** (1:1.5 w/w %), (e) **M-PTB7(32k):PC<sub>70</sub>BM** (1:1.5 w/w %), and (f) **M-PTB7(75k):PC<sub>70</sub>BM** (1:1.5 w/w %) with DIO-processed. The size of images is 5 x 5  $\mu\text{m}^2$ .

**Fig. S8.** MALDI-TOF spectrum for microwave-assisted condition generated the reaction mixture, **TIPS-BDT-FTT-BDT-TIPS** (compound **A**), **TIPS-BDT-FTT-FTT-BDT-TIPS** (compound **B**), and **TIPS-BDT-BDT-TIPS** (compound **C**).

**Fig. S9.** MALDI-TOF spectrum for thermal-assisted condition generated the reaction mixture, **TIPS-BDT-FTT-BDT-TIPS** (compound **A**), **TIPS-BDT-FTT-FTT-BDT-TIPS** (compound **B**), and **TIPS-BDT-BDT-TIPS** (compound **C**).

**Fig. S10.** Normalized UV-vis absorption spectrum for model compound **A**, compound **B** and compound **C** in the chlorobenzene solution ( $1 \times 10^{-5}$  M).

**Table S1.** Packing parameters derived from 1D GIXRD measurements.

## 1. Materials

The monomer of 2,6-bis(trimethyltin)-4,8-Diethylhexyloxybenzo[1,2-b;3,4-b]dithiophene (BDT) was synthesized according to a previously reported method.<sup>1,2</sup> The acceptor monomer of 2-ethylhexyl-4,6-dibromo-3-fluorothieno[3,2-c]thiophene-2-carboxylate (FTT) was purchased from Suna Tech Inc. All of other chemicals were used as received.

## 2. Instruments

Microwave irradiation polymerization reactions were performed using a “Monowave 300” single-mode microwave reactor with a maximum of 850 W magnetron output powers. <sup>1</sup>H NMR spectra were recorded on a Bruker BioSpin AG system operated at 600 MHz in deuterated chloroform solution at 298 K, unless specified otherwise. Chemical shifts ( $\delta$  values) were recorded in units of ppm relative to tetramethylsilane (TMS) as an internal standard. The molecular weights of synthesized **M-PTB7** polymers and **T-PTB7** polymer were determined from calibration curve based on polystyrene standards recorded on Gel Permeation chromatography using the Shimadzu LC solution at a flow rate of 1.0 mL/min chlorobenzene solution at 40 °C. Thermogravimetric analysis (TGA) were performed with TG/DTA Q500 (TA Instrument) at a heating rate of 10 °C/min ramp from 50 to 900 °C under a nitrogen atmosphere. Differential scanning calorimetric (DSC) measurements of **T-PTB7(31k)** (sample wt: 4 mg) and **M-PTB7** polymers (samples wt: 4 mg) were performed using a Perkin-Elmer Pyris DSC 4000 instrument under a nitrogen atmosphere at a heating and cooling rate of 10 °C/min. Elemental analysis for all **PTB7** polymers were performed using a Thermofinnigan EA 2000 CHNS analyzer and Thermofinnigan EA1112 Oxygen analyzer under argon atmosphere. UV-Vis absorption spectrum and photoluminescence (PL) spectrum of **T-PTB7(31k)** polymer and **M-PTB7** polymers solutions recorded using an OPTIZEN POP UV-Vis double beam spectrometer and Jasco FP-6500 spectrometer, respectively. Electrochemical cyclic voltammetry (PowerLab/AD instrument model system) were recorded in a computer controlled potentiostat conventional three-electrode system in polymer thin films using a glassy carbon disk as the working electrode, platinum-wire as the counter electrode, and silver wire as the quasi-reference electrode in a acetonitrile (AN, HPLC grade) solution containing 0.1 M tetrabutylammonium hexafluorophosphate (Bu<sub>4</sub>NPF<sub>6</sub>) as supporting electrolyte at a scan rate of 20 mV/s. Ferrocene is used as internal standard to calculate frontier orbital energy levels of polymers. Raman spectroscopy measurements were carried out for all polymer thin films using a Renishaw inVia microscope with a 50 $\times$  objective in a back-scattering configuration. The excitation source was a 488 nm (Ar ion) laser, spectra were obtained with a laser power of  $\sim$ 0.9 mW and an acquisition time of 60 s in an N<sub>2</sub> environment. Grazing-incidence XRD (GIXD) measurements were performed at the 5A XRS beamline

( $\lambda \approx 1.07 \text{ \AA}$ ), with an incident energy of 11.56 keV, at the Pohang Accelerator Laboratory (PAL). The X-ray incident angle was fixed at  $0.2^\circ$  to maximize the diffracted signal and minimize the background from substrate scattering. Topographic images of the neat polymers (**T-PTB7(31k)**, **M-PTB7(32k)**, **M-PTB7(75k)**) and polymer:PC<sub>70</sub>BM films (surface area:  $5 \times 5 \mu\text{m}^2$ ) were recorded using a digital Nanoscope III atomic force microscope operated in the tapping mode under ambient conditions. Films were prepared by dissolving **T-PTB7(31k)** and **M-PTB7** polymers and **PC<sub>70</sub>BM** in chlorobenzene and followed by spin-coating on the top surface of a glass substrate. The prepared samples were annealed at  $120^\circ\text{C}$  on a hot plate under nitrogen before measurement. MALDI-TOF mass spectroscopic analyzes were recorded on a Bruker Daltonics UltrafleXtreme MALD-TOF system, a Relative positive method (RP) using dithranol as matrix (10 mg in 0.5 mL of DCM).

### 3. Fabrication and characterization

Solar cell devices were fabricated on  $2.5 \times 2.5 \text{ cm}$  pre-patterned ITO-glass substrates. The ITO-glass substrates were washed using detergent, deionized water (DI-water), acetone and isopropyl alcohol (IPA). After washing, the ITO coated glass substrates were dried in the  $140^\circ\text{C}$  oven overnight. The ITO coated glass substrates were treated with the UV-ozone for 15 mins. The sol-gel of ZnO solution was prepared with zinc acetate dehydrate ( $\text{Zn}(\text{CH}_3\text{COO})_2 \cdot 2\text{H}_2\text{O}$ , Aldrich, 99.9%, 1g) and Ethanolamine ( $\text{NH}_2\text{CH}_2\text{CH}_2\text{OH}$ , Aldrich, 99.5%, 0.28g) dissolved in 2-methoxyethanol ( $\text{CH}_3\text{OCH}_2\text{CH}_2\text{OH}$ , Aldrich, 99.8%, 10mL) under vigorous stirring for 12 h,  $60^\circ\text{C}$ , hydrolysis reaction in the air. The ZnO sol-gel solution was spin-coated at 5000 rpm for 30 seconds on the pre-cleaned ITO-glass substrate. The films were heated at  $200^\circ\text{C}$  for 1 h in air, and then the devices were transferred to a glove box. A solution containing the blend of PTB7:PC<sub>70</sub>BM (1:1.5, weight ratio) in chlorobenzene with 3 vol% diiodooctane (DIO) was spin-coated at 1200 rpm for 30 seconds on the ZnO ( $\sim 100 \text{ nm}$ ). Then, the samples were dried overnight under nitrogen atmosphere at room temperature. Finally, to complete the devices, MoO<sub>3</sub> (20 nm) and Ag (100 nm) layers were thermally evaporated with a shadow mask under high vacuum (less than  $10^{-6}$  Torr). The active area of the fabricated device was  $0.04 \text{ cm}^2$ . Using a Keithley 2400 SMU and an Oriel xenon lamp (450 W) with an AM1.5 filter, the solar cells were characterized in air under AM 1.5G illumination of  $100 \text{ mW/cm}^2$  (Oriel 1 kW solar simulator), which was calibrated with a KG5 filter.

#### 4. Electrochemical Properties

The electrochemical properties of **T-PTB7(31k)** and **M-PTB7** polymers were determined using cyclic voltammeter on the thin film as shown in Fig. S4 and the overall results were summarized in **Table 1**. The position of HOMO and LUMO energy levels of all **PTB7** polymers were estimated from onset point of oxidation potential and optical band gap of corresponding polymer in thin film, respectively. From Table 1, it can be seen that **M-PTB7** polymers from **M-PTB7(32k)** to **M-PTB7(75k)** show the high-lying HOMO energy level as compared to that of **T-PTB7(31k)**, whereas the LUMO energy levels were decreased. This result indicates that the homo-coupled units in the main chain of **M-PTB7** polymers could acts as lower lying energy trapping sites results in high-lying HOMO energy levels and decreased the LUMO energy levels.<sup>3</sup>

#### 5. Raman Spectroscopy study

We used Raman spectroscopy method to sense the existence of homo-coupled units and its origin of Raman vibrational modes in **M-PTB7(32k)** (Fig. 2d). From Fig. 2d, both **T-PTB7(31k)** and **M-PTB7(32k)** polymers exhibited a distinctive Raman spectrum with four major peaks from vibrational modes of the common features of **PTB7**. In case of **T-PTB7(31k)**, **Peak 1** ( $\sim 1498\text{ cm}^{-1}$ ) was attributed due to the C=C stretching mode of **BDT** unit's fused thiophenes, **Peak 2** ( $\sim 1553\text{ cm}^{-1}$ ) was assigned due to a coupled vibration of the identical mode to the C=C stretching mode of non-fluorinated thiophene of **TT** unit, **Peak 3** ( $\sim 1575\text{ cm}^{-1}$ ) was ascribed due to a quadrant stretching mode attached to the C=C stretching mode of the fluorinated thiophene of **TT**. A weak **peak 4** at  $\sim 1708\text{ cm}^{-1}$  was associated to the less Raman-active C=O stretching mode of **TT** unit's side chain of ester groups. The Raman bands arises from 1200 to 1360  $\text{cm}^{-1}$  were assigned due to the stretching mode of phenylene-alkoxy (R-O) group in **BDT** unit.<sup>4,5</sup> Although **T-PTB7(31k)** and **M-PTB7(32k)** showed nearly similar the shape of C=C and C=O stretching vibrational modes, they exhibited little difference in Raman vibrational modes (Fig. S5a and S5b). However, **M-PTB7(75k)** showed remarkable difference in the Raman vibrational modes (Fig. 2d) in terms of (i) decreased the intensity of **Peak 1** with  $\sim 4\text{ cm}^{-1}$  shifted to higher wavenumbers, (ii) increased the intensity of **Peak 2** with  $\sim 5\text{ cm}^{-1}$  shifted to higher wavenumbers, and (iii) little changes in **Peak 3** as well as in Raman less weak **Peak 4** of Raman vibrational modes of **M-PTB7(75k)**, indicating the C=C bonds for (i) fused thiophene of **BDT** units (Peak 1), (ii) non-fluorinated thiophene (Peak 2), (iii) fluorinated thiophene of **TT** units (Peak 3), and (iv) less Raman-active C=O bonds of **TT** unit's side chain of ester groups (weak Peak 4) were vibrating at higher frequency. From these results, we speculated that the existence of homo-coupled units such as **BDT-FTT-FTT** (Fig. 2b) unit and **BDT-BDT** (Fig. 2c) unit in the main chain of **M-**

**PTB7(75k)** polymers induced polymer aggregation which led to significant change in the Raman peaks intensity as well as shifted to higher wavenumbers as compared to **T-PTB7(31k)**. These effects originated from decreased intra- and intermolecular interaction and decreased conjugation lengths in **M-PTB7(75k)** thin film. Thus, this finding clearly provides the evidence that synthesized **PTB7 (M-PTB7)** polymers by microwave-assisted Stille cross-coupling polymerization method generates a existence of **BDT-FTT-FTT** as well as **BDT-BDT** units. Furthermore, the noticeable difference between the Raman spectrum of **T-PTB7(31k)** and **M-PTB7** polymers (Fig. 2d) clearly suggested that **PTB7 (T-PTB7(31k))** prepared by thermal condition is virtually free from such a kind of homo-coupled units.

**Scheme S1.** Mechanism of homo-coupled units (**BDT-BDT**, **FTT-FTT**) under the microwave-assisted conditions.

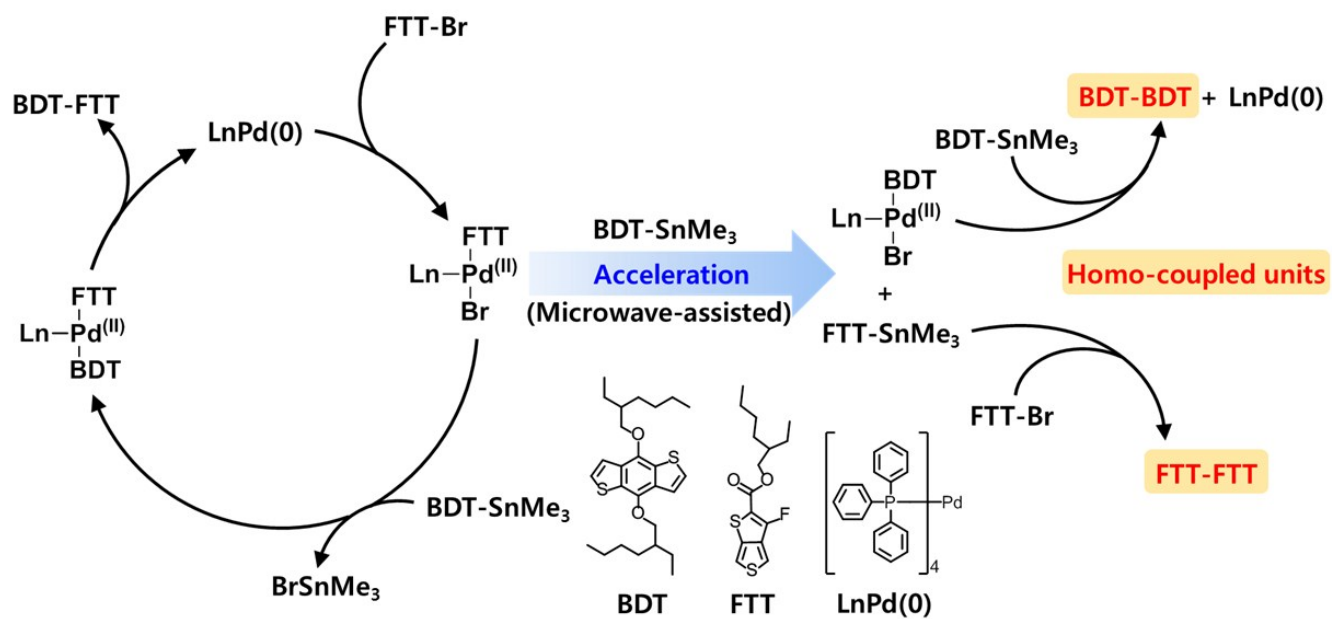

Fig. S1. GPC chromatograms for T-PTB7(31k) and M-PTB7 polymers.

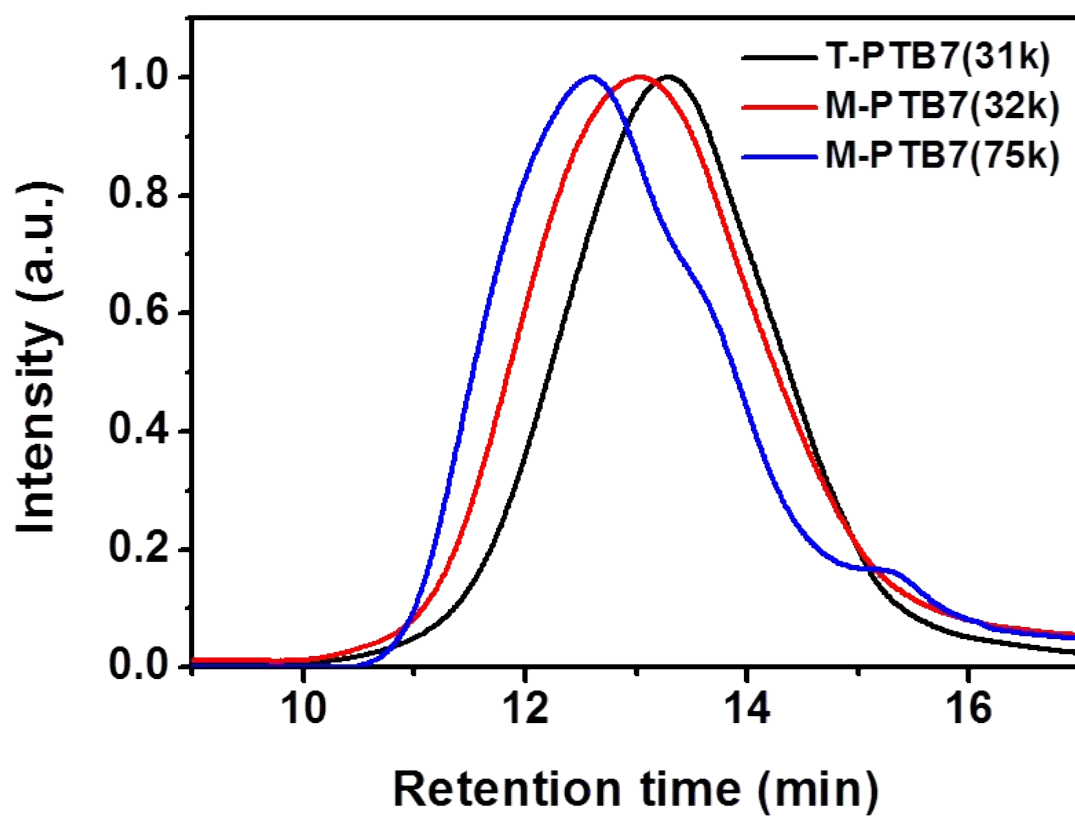



**Fig. S2.** TGA curves of T-PTB7(31k) and M-PTB7 polymers with a heating rate of 10°C/min under N<sub>2</sub>.

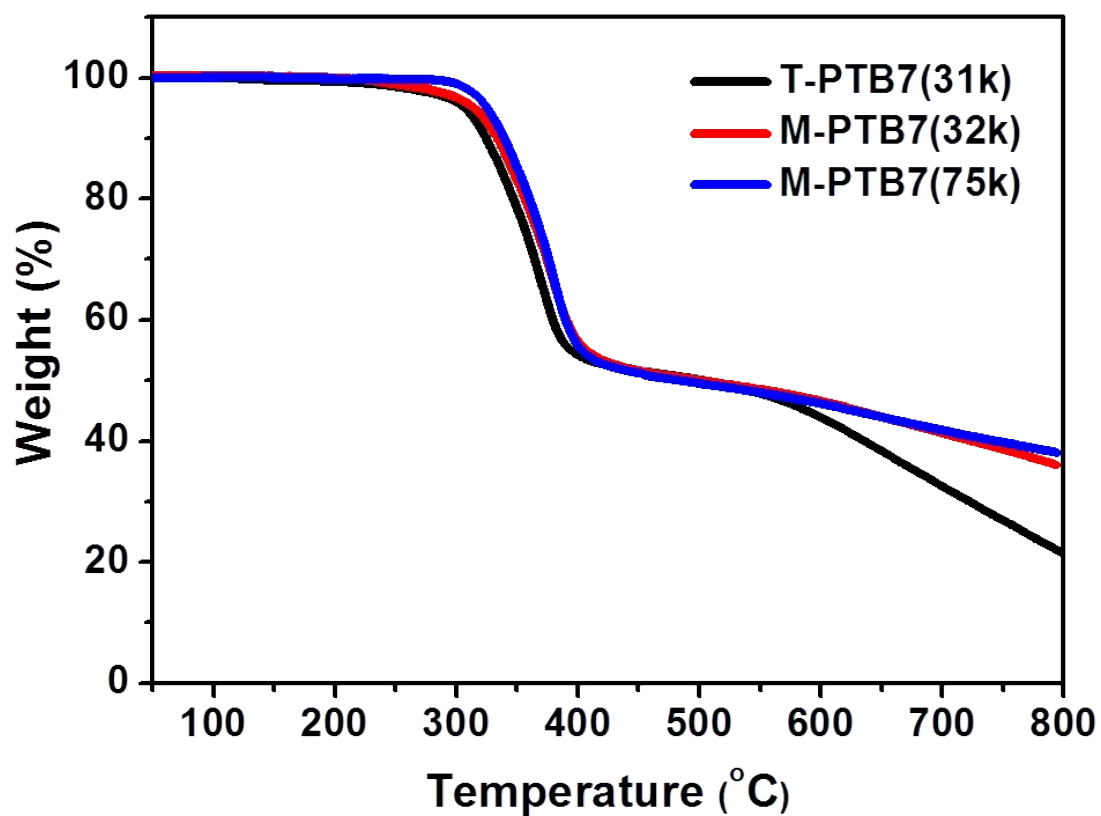

**Fig. S3.** DSC thermograms for **T-PTB7(31k)** and **M-PTB7** polymers with a heating and cooling rate of 10 °C/min under N<sub>2</sub>.

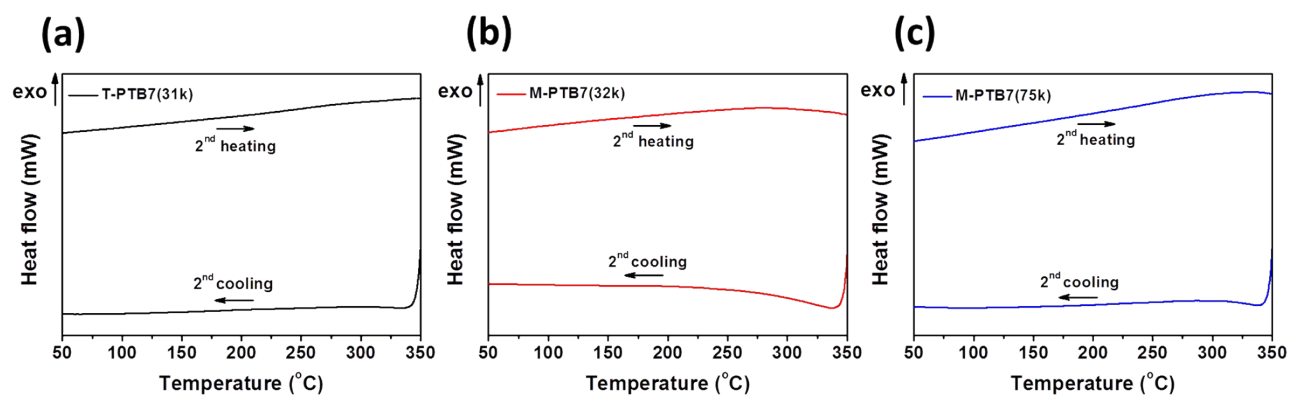

**Fig. S4.** Cyclic voltammograms for **T-PTB7(31k)** and **M-PTB7** polymers thin films in acetonitrile solution containing 0.1 M  $\text{Bu}_4\text{NPF}_6$  at a potential scan rate of 20 mV/s.

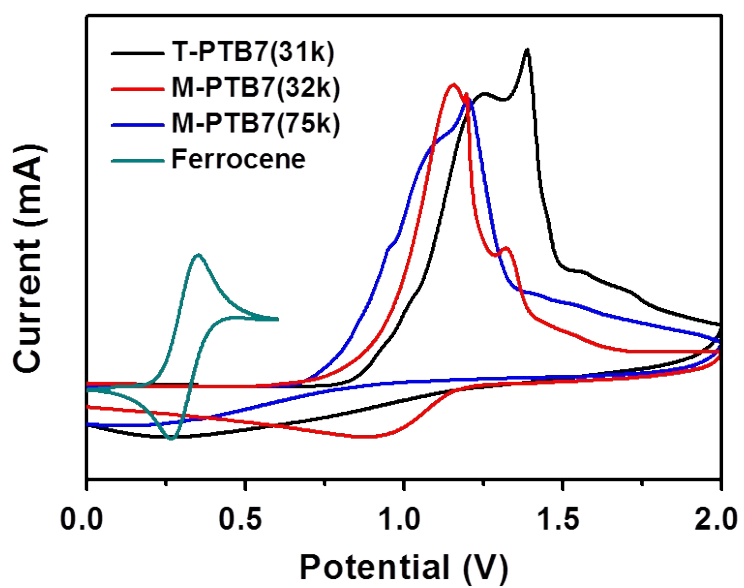

**Fig. S5.** (a) Extended Raman spectra for Peak 1, Peak 2 and Peak 3 of **T-PTB7(31k)** and **M-PTB7** polymers (b) Extended Raman spectra for less Raman active weak Peak 4 of **T-PTB7(31k)** and **M-PTB7** polymers.

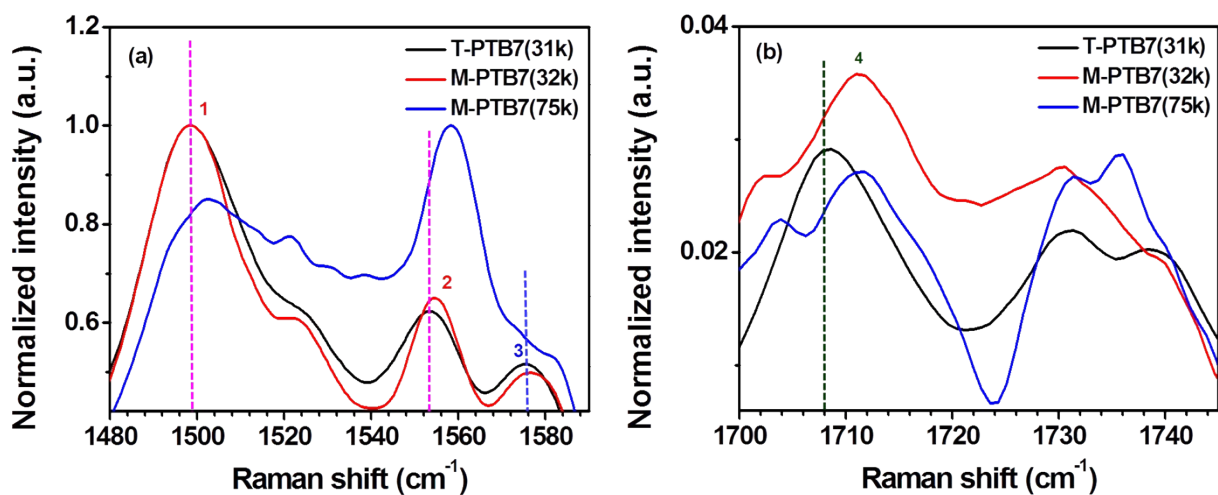

**Fig. S6.** (a). Statistical analysis of (a) short-circuit current ( $J_{SC}$ ), (b) fill factor (FF), (c) open-circuit voltage ( $V_{OC}$ ) and (d) power conversion efficiency (PCE) depending on the PTB7-polymers.

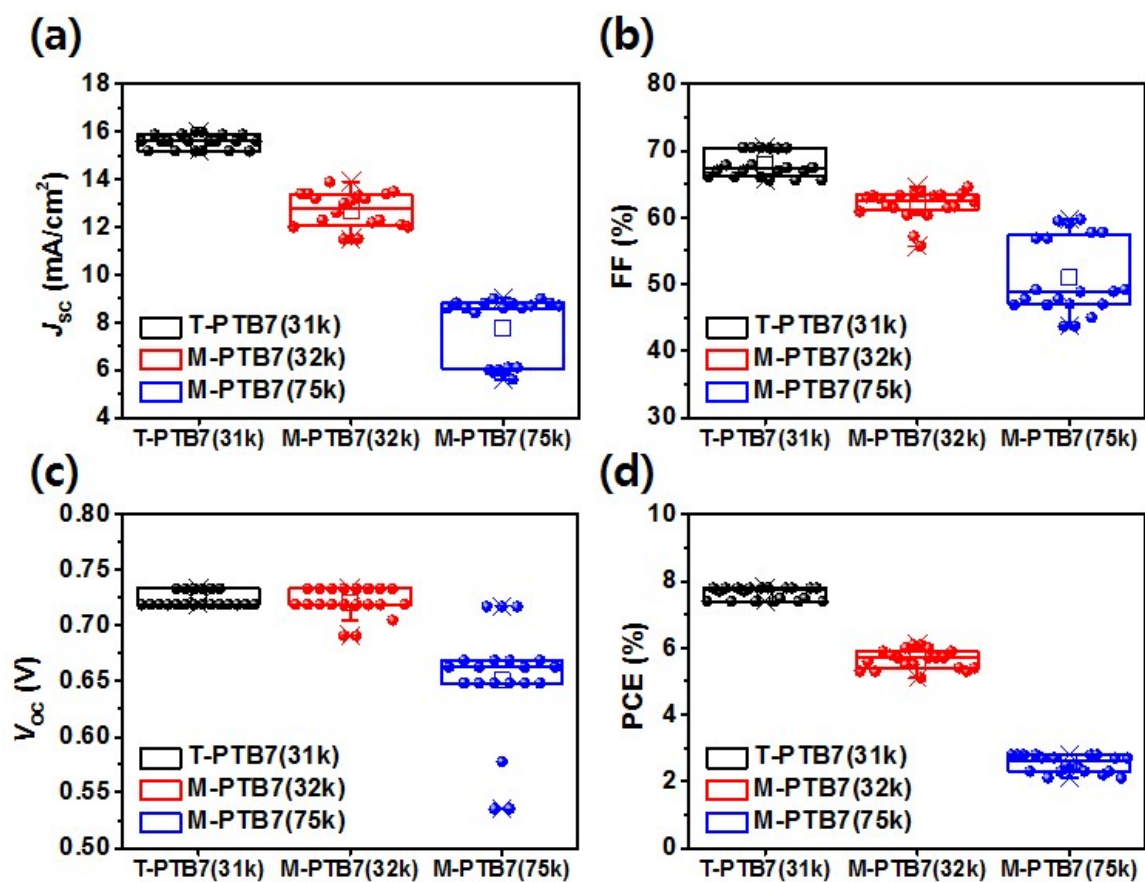

**Fig. S7.** AFM topographic images of (a) **T-PTB7(31k):PC<sub>70</sub>BM** (1:1.5 w/w %), (b) **M-PTB7(32k):PC<sub>70</sub>BM** (1:1.5 w/w %), and (c) **M-PTB7(75k):PC<sub>70</sub>BM** (1:1.5 w/w %) with DIO-processed. The AFM phase images of (d) **T-PTB7(31k):PC<sub>70</sub>BM** (1:1.5 w/w %), (e) **M-PTB7(32k):PC<sub>70</sub>BM** (1:1.5 w/w %), and (f) **M-PTB7(75k):PC<sub>70</sub>BM** (1:1.5 w/w %) with DIO-processed. The size of images is 5 x 5  $\mu\text{m}^2$ .

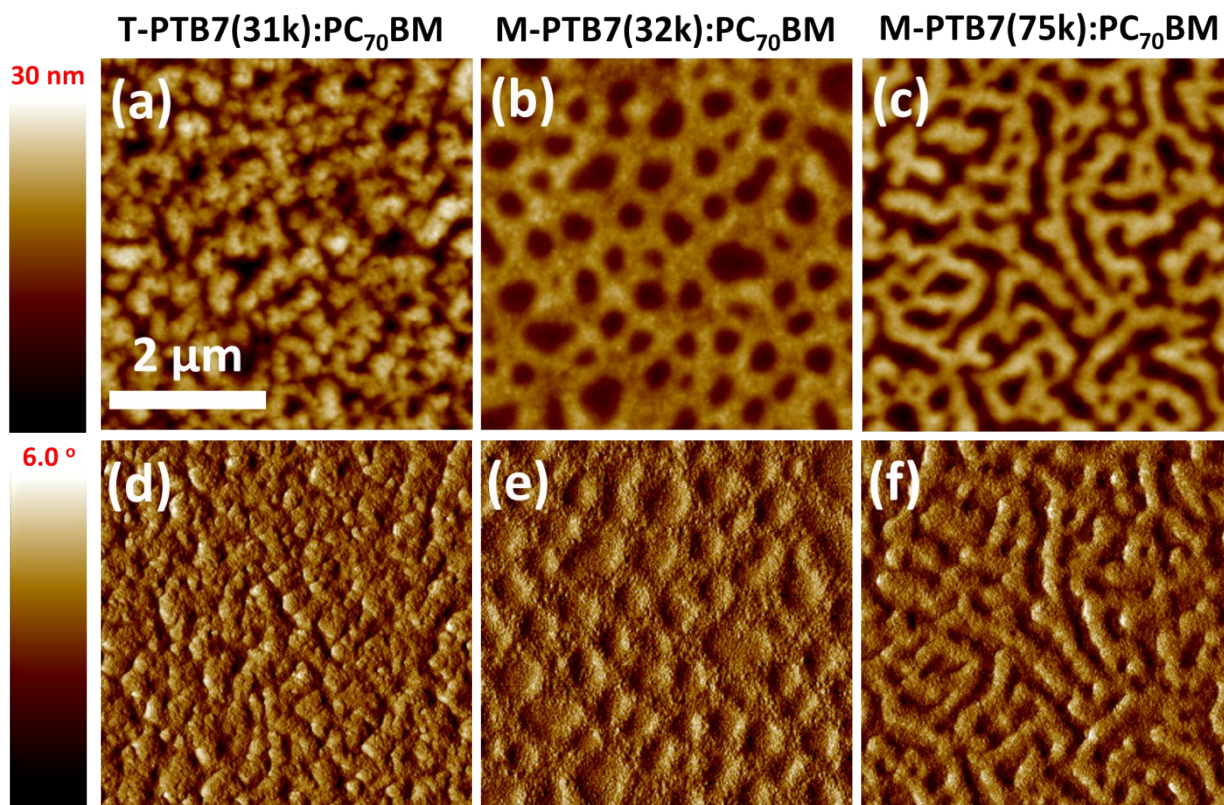

**Fig. S8.** MALDI-TOF spectrum for microwave-assisted condition generated the reaction mixture, TIPS-BDT-FTT-BDT-TIPS (compound A), TIPS-BDT-FTT-FTT-BDT-TIPS (compound B), and TIPS-BDT-BDT-TIPS (compound C).

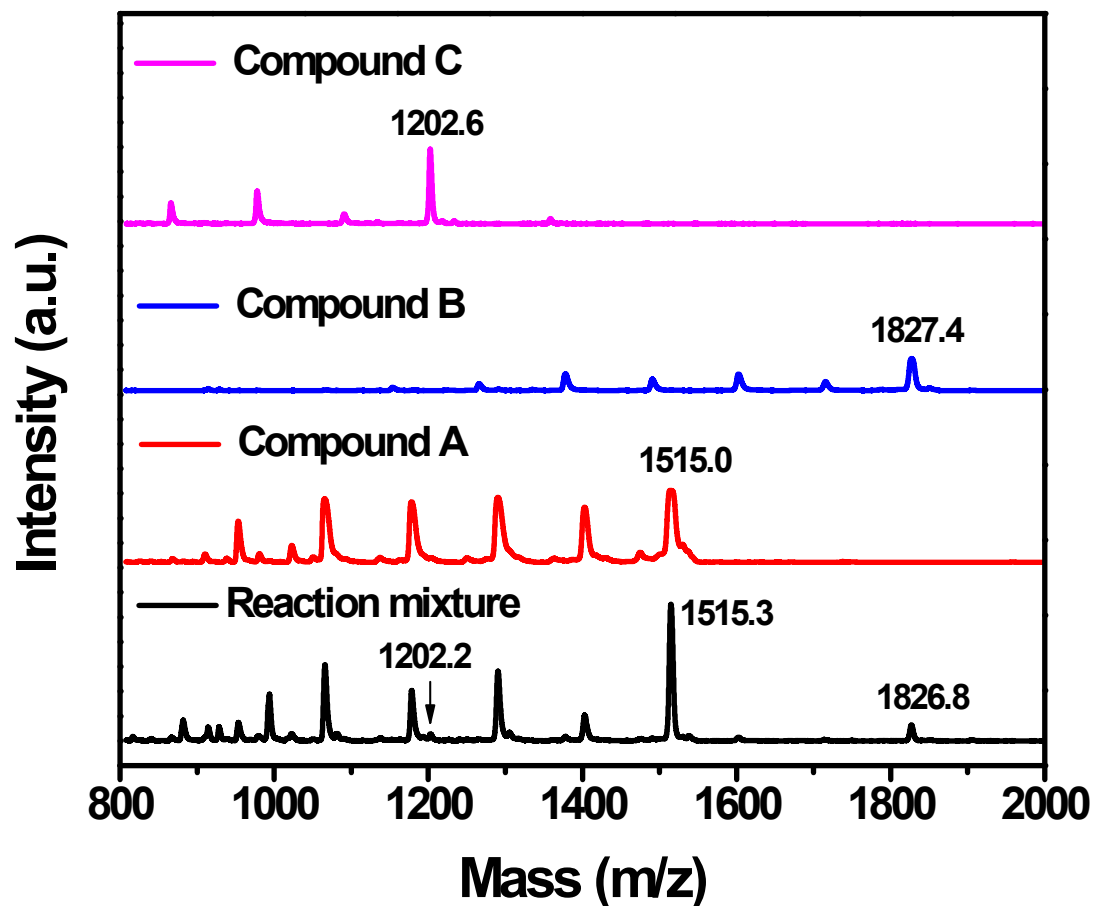

**Fig. S9.** MALDI-TOF spectrum for thermal-assisted condition generated the reaction mixture, **TIPS-BDT-FTT-BDT-TIPS** (compound **A**), **TIPS-BDT-FTT-FTT-BDT-TIPS** (compound **B**), and **TIPS-BDT-BDT-TIPS** (compound **C**).

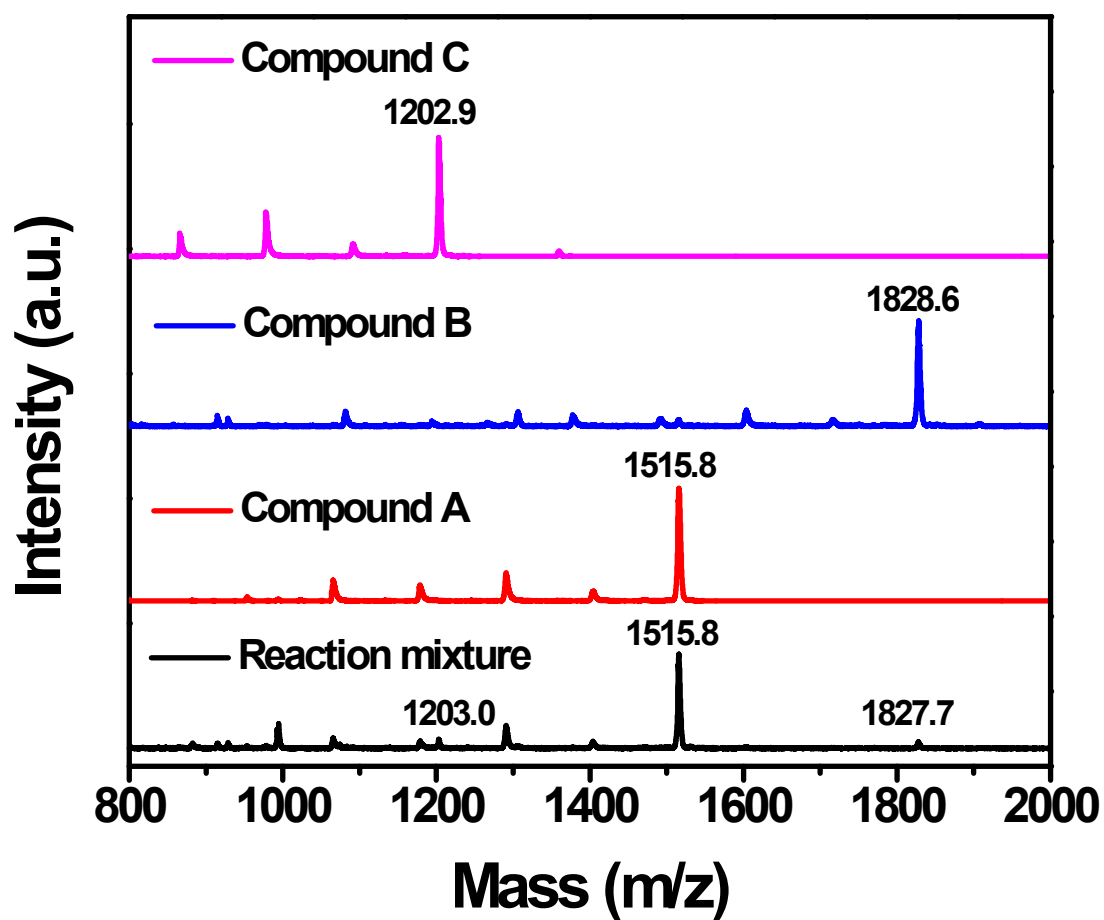



**Fig. S10.** Normalized UV-vis absorption spectrum for model compound A, compound B and compound C in chlorobenzene solution ( $1 \times 10^{-5}$  M).

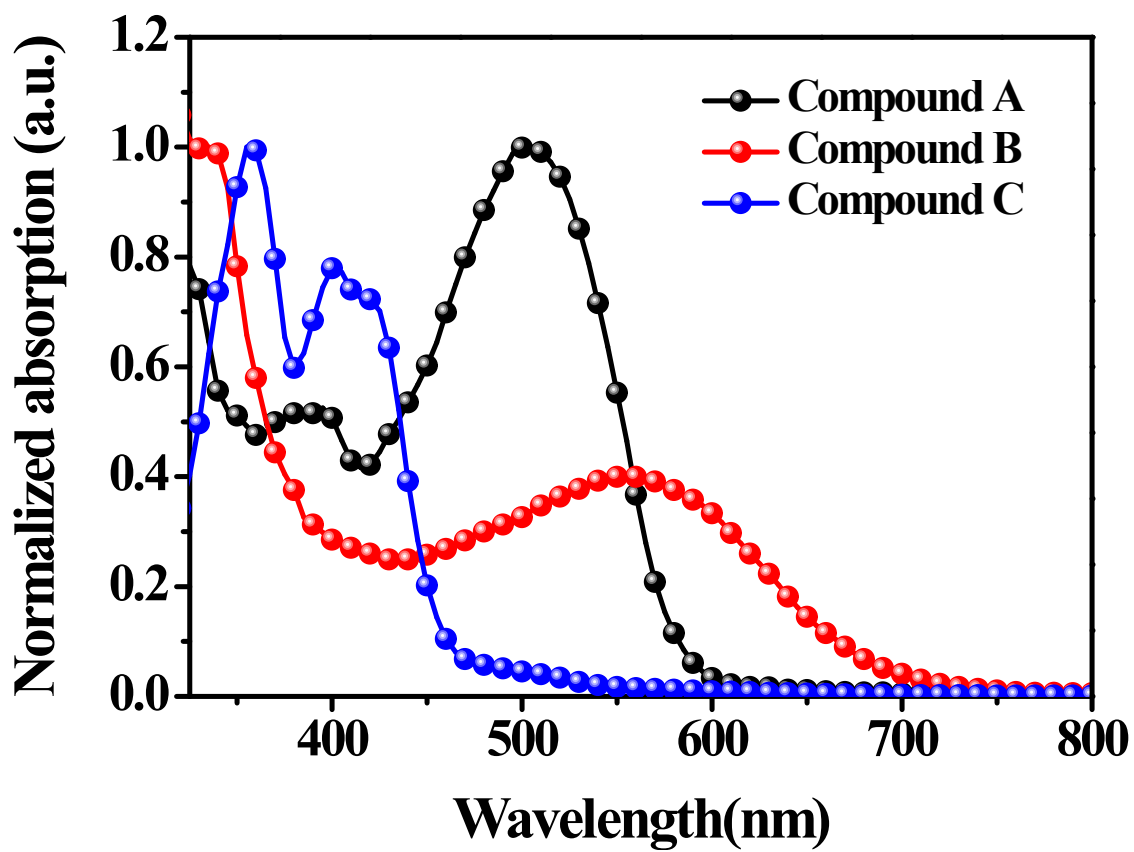

**Table S1.** Packing parameters derived from 1D GIXRD measurements.

| Films                                      | Crystallographic parameters              |                      |                                                          |                      |
|--------------------------------------------|------------------------------------------|----------------------|----------------------------------------------------------|----------------------|
|                                            | Lamellar spacing<br>(In-plane direction) |                      | $\pi$ - $\pi$ stack distance<br>(Out-of-plane direction) |                      |
|                                            | $q_{xy}$<br>( $\text{nm}^{-1}$ )         | $d$ -spacing<br>(nm) | $q_z$<br>( $\text{nm}^{-1}$ )                            | $d$ -spacing<br>(nm) |
| <b>T-PTB7(31k)</b>                         | 3.22                                     | 1.95                 | 16.17                                                    | 0.39                 |
| <b>M-PTB7(32k)</b>                         | 3.12                                     | 2.01                 | 16.12                                                    | 0.39                 |
| <b>M-PTB7(75k)</b>                         | 2.97                                     | 2.11                 | 16.02                                                    | 0.39                 |
| <b>T-PTB7(31k):PC<sub>70</sub>BM blend</b> | 3.53                                     | 1.78                 | 16.02                                                    | 0.39                 |
| <b>M-PTB7(32k):PC<sub>70</sub>BM blend</b> | 3.27                                     | 1.92                 | 15.92                                                    | 0.39                 |
| <b>M-PTB7(75k):PC<sub>70</sub>BM blend</b> | 3.17                                     | 1.98                 | 15.92                                                    | 0.39                 |

## References

- [1] J.-H. Kim, H. U. Kim, C. E. Song, I. -N. Kang, J. -K. Lee, W. S. Shin, D.-H. Hwang, *Sol. Energy Mater. Sol. Cells* 108 (2013) 113–125.
- [2] J. Hou, H.-Y. Chen, S. Zhang, Y. Yang, *J. Phys. Chem. C* 113 (2009) 21202–21207.
- [3] F. J. Lim, A. Krishnamoorthy, G. W. Ho, *ACS Appl. Mater. Interfaces* 7 (2015) 12119–12127.
- [4] S. Chambon, A. Rivaton, J. L. Gardette, M. Firon, *Sol. Energy Mater. Sol. Cells* 92 (2008) 785–792.
